# Supplementary material
Source: PubMed Central journal article supplement (PMC3307304)
Supplement: supp_M111.287581_JBC287581r_plaintext_SI_Revised_Dec22.pdf [file supp_M111.287581_JBC287581r_plaintext_SI_Revised_Dec22.pdf]

## SUPPLEMENTAL DATA

### **Metallo-GTPase HypB from *Helicobacter pylori* and Its Interaction with Nickel Chaperone Protein HypA**

**Wei Xia<sup>1</sup>, Hongyan Li<sup>1</sup>, Xinming Yang<sup>1</sup>, Kam-Bo Wong<sup>2</sup>, Hongzhe Sun<sup>1,\*</sup>**

<sup>1</sup>Department of Chemistry, The University of Hong Kong, Pokfulam Road,  
Hong Kong SAR, China (hsun@hku.hk)

<sup>2</sup>School of Life Sciences, Center for Protein Science and Crystallography, The Chinese  
University of Hong Kong, Shatin, Hong Kong SAR, China

#### **TABLE OF CONTENTS**

**Table S1** Primers used for PCR reactions.

**Table S2** Primers used for plasmid construction in GFP-fragment reassembly experiment.

**Table S3** MALDI-TOF MS/MS analysis of trypsin digested protein SDS-PAGE bands.

**Figure S1** Binding of Ni<sup>2+</sup> and GTP to *Hp*HypB mutants.

**Figure S2** Different UV-vis spectra of Ni<sup>2+</sup> solution up titration GTP.

**Figure S3** Crystal structure of *Mj*HypB (PDB ID: 2HF9) showing the conserved K153 and the hydrophobic core region with L171 and V175 highlighted.

**Figure S4** GTPase activities of HypB and its mutants determined by Malachite Green method.

**Figure S5** Determination of binding affinities of GTP to HypB proteins by isothermal titration calorimetry.

**Figure S6** Determination of binding affinities of HypA to HypB by isothermal titration calorimetry.

**Figure S7** The effect of Ni<sup>2+</sup> on the intracellular fluorescence.

**Figure S8** Mapping the residues experiencing large chemical shift perturbations upon binding of HypB and Ni<sup>2+</sup> on the structure of HypA.

**Figure S9** Sequence alignments of HypB and UreG proteins.

**Table S1** Primers used for PCR reactions. Restriction sites are highlighted in bold.

| Name                         | Sequence                                               |
|------------------------------|--------------------------------------------------------|
| WT-HypB (forward)            | 5' GGAATTCC <b>CATATG</b> AGCGAACAACGACAAGAA 3'        |
| WT-HypB (reverse)            | 5' CG <b>GAATTC</b> TAAAAACGAATGCGTGGACTG 3'           |
| HypB $\Delta$ 24N (forward)  | 5' GGAATTCC <b>CATATG</b> AAGATTTTGAGTAAGAACGACATTA 3' |
| HypB(M186L, F190V) (forward) | 5' AAAGCGGATCTGGTTGAGGTGGTTAATTCAG 3'                  |
| HypB(M186L, F190V) (reverse) | 5' ACTGATAATCACCGCATCCGCG 3'                           |
| HypB(K168A) (forward)        | 5' ATGATAAGGTGCTAGCATACCCTACGATGTTCA 3'                |
| HypB(K168A) (reverse)        | 5' CGCCCTCTGGAACGGAGAGTA 3'                            |
| HypB(K18A) (forward)         | 5' CCCTAATTTGAGTAAAGCAGATGTCAAAATCGTA 3'               |
| HypB(K18A) (reverse)         | 5' TTATTTTGTAAGATTCTTGTCGTTGTTTCG 3'                   |
| HypB(V20A) (forward)         | 5' TTGAGTAAAAAAGATGCCAAAATCGTAGAAAAG 3'                |
| HypB(V20A) (reverse)         | 5' ATTAGGGTTATTTTGTAAGATTCTTGTCGTTGTT 3'               |
| HypB(K21A) (forward)         | 5' GAGTAAAAAAGATGTCGCAATCGTAGAAAAGATTTT 3'             |
| HypB(K21A) (reverse)         | 5' AAATTAGGGTTATTTTGTAAGATTCTTGTCGTT 3'                |
| HypB(I22A) (forward)         | 5' AAAAAGATGTCAAAGCCGTAGAAAAGATTTG 3'                  |
| HypB(I22A) (reverse)         | 5' TACTCAAATTAGGGTTATTTTGTAAGATTCTTGT 3'               |

### Preparation of metal-bound HypB

To prepare Zn<sup>2+</sup>- or Ni<sup>2+</sup>-bound HypB proteins, 2 molar equivalents of Zn<sup>2+</sup> (as ZnCl<sub>2</sub>) or 5 molar equivalents of Ni<sup>2+</sup> (as Ni<sub>2</sub>SO<sub>4</sub>) were added into freshly purified HypB in 20 mM HEPES buffer (pH 7.0) containing 100 mM NaCl. After incubation for 1 hour at 4 °C, excess metal ions were removed by HiTrap desalting column. The metal content of protein was measured by ICP-MS (Agilent 7500).

### Plasmid construction for GFP-fragment reassembly experiment

HypA protein was fused to the N-terminal fragment (residues 1-157) of GFP (N-GFP) by a spacer linker with sequence of GGSGSGSS and cloned into the plasmid pET32a (AmpR). The C-terminal fragment (residues 158-238) of GFP (C-GFP) was fused similarly to HypB protein by a spacer linker with sequence of GTSGGSG. Particularly, a SD sequence (AAGGAG) was added at the 5' of *hypB* gene and cloned into the pBAD33 plasmid (CmR) for expression (1). The DNA fragments of N-GFP and C-GFP were amplified by PCR reactions using pEGFP plasmid as template, *hypA* and *hypB* genes were amplified from *H. pylori* 26695 genomic DNA. The DNA fragments were fused together by bridging PCR (2) using primers listed in Table S2.

**Table S2** Primers used for plasmid construction in GFP-fragment reassembly experiment. Restriction sites are highlighted in bold and spacer linkers are shown as lowercase.

|                              |                                                 |
|------------------------------|-------------------------------------------------|
| <b>For N-GFP</b>             |                                                 |
| N-GFP( <i>Nde</i> I)-for:    | 5' GGAATTCC <b>CATATG</b> GTTGAGCAAGGGCG 3'     |
| N-GFP( <i>Xho</i> I)-rev:    | 5' CCG <b>CTCGAG</b> TACTGCTTGTCGGCCATG 3'      |
| <b>For C-GFP</b>             |                                                 |
| C-GFP( <i>Eco</i> RI)-for:   | 5' <b>GGAATTC</b> ATGAAGAACGGCATCAAGG 3'        |
| C-GFP( <i>Hind</i> III)-rev: | 5' CCC <b>AAGCTT</b> TACTTGTACAGCTCGTCCATG 3'   |
| <b>For NGFP-HypA</b>         |                                                 |
| N-GFP( <i>Nde</i> I)-for:    | 5' GGAATTCC <b>CATATG</b> GTTGAGCAAGGGCG 3'     |
| N-GFP(spacer)-rev:           | 5' AGccagagccagagccaccCTGCTTGTCGGCCATG 3'       |
| HypA(spacer)-for:            | 5' gctctggctctggCTCGTCcATGCATGAATACTCGGTCTG 3'  |
| HypA( <i>Xho</i> I)-rev:     | 5' CCG <b>CTCGAG</b> TATTCCGCTAACATTTCTAAAGA 3' |
| <b>For HypB-CGFP</b>         |                                                 |
| HypB( <i>Eco</i> RI)-for:    | 5' <b>GGAATTC</b> ATGAGCGAACAACGACAAGA 3'       |
| HypB(spacer)-rev:            | 5' cgettcaccGACGTCCcAAACGAATGCGTGGACT 3'        |
| C-GFP(spacer)-for:           | 5' CGTCgggtggaagcggttaagATGAAGAACGGCATCAAGG 3'  |
| C-GFP( <i>Hind</i> III)-rev: | 5' CCC <b>AAGCTT</b> TACTTGTACAGCTCGTCCATG 3'   |

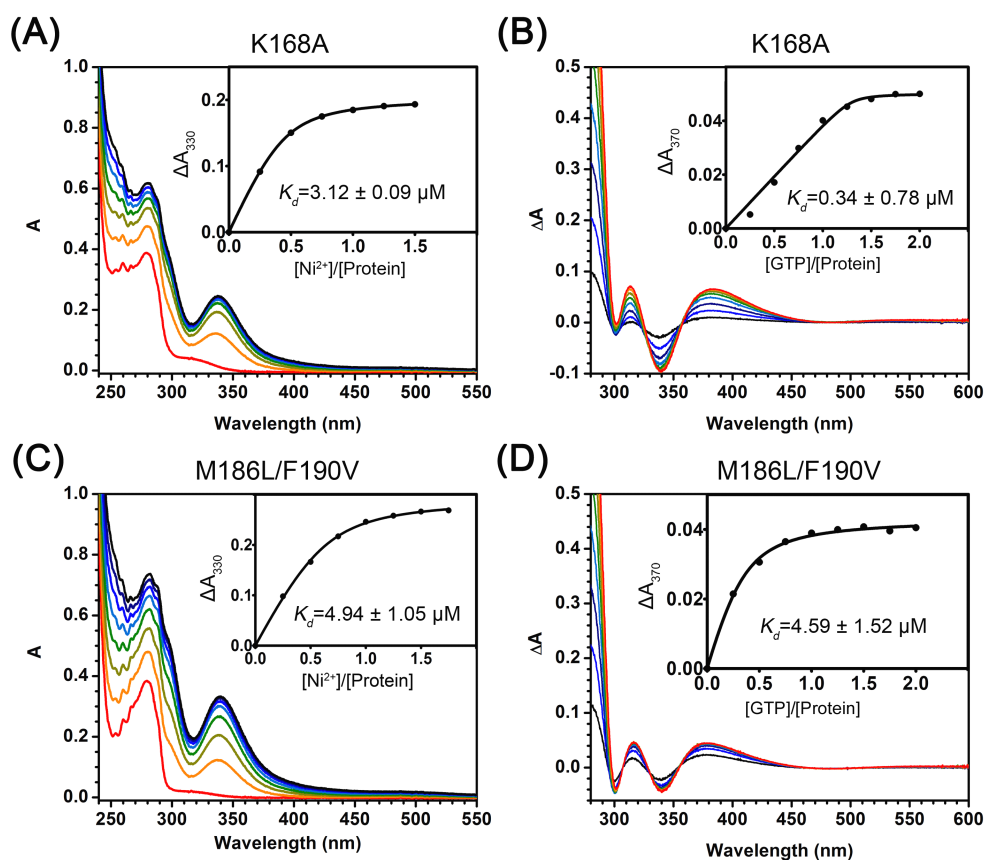

**FIGURE S1 Binding of  $\text{Ni}^{2+}$  and GTP to *HypB* mutants.** UV-vis spectra of 50  $\mu\text{M}$  mutant proteins **(A)** HypB(K168A) and **(C)** HypB(M186L/F190V) in the absence and presence of different molar equivalents of  $\text{Ni}^{2+}$  (as 10 mM  $\text{NiSO}_4$ ) in 20 mM Tris-HCl buffer, pH 7.4 containing 100 mM NaCl, 200  $\mu\text{M}$  TCEP. Difference UV-vis spectra of **(B)**  $\text{Ni}^{2+}$ -HypB(K168A) and **(D)**  $\text{Ni}^{2+}$ -HypB(M186L/F190V) with increasing amounts of GTP. The titration curves were fitted to Ryan-Weber nonlinear equation to determine the dissociation constants ( $K_d$ ).

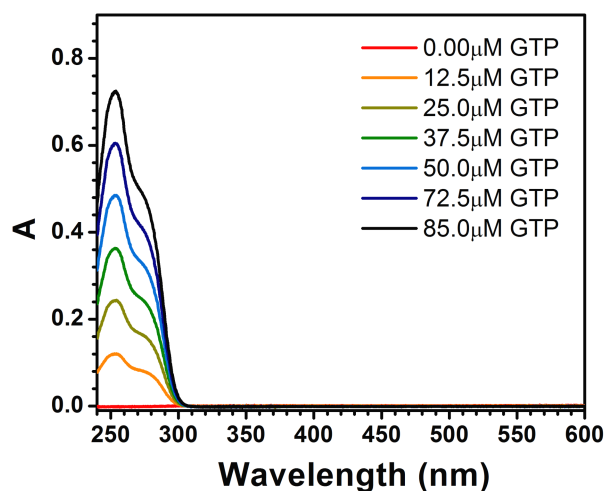

**FIGURE S2 Different UV-vis spectra of  $\text{Ni}^{2+}$  solution upon titration of GTP.** The spectra were recorded for approximate 50  $\mu\text{M}$   $\text{NiSO}_4$  in 20 mM Tris-HCl buffer containing 100 mM NaCl, 200  $\mu\text{M}$  TCEP, and 1 mM  $\text{MgSO}_4$  at pH 7.4 with stepwise addition of GTP.

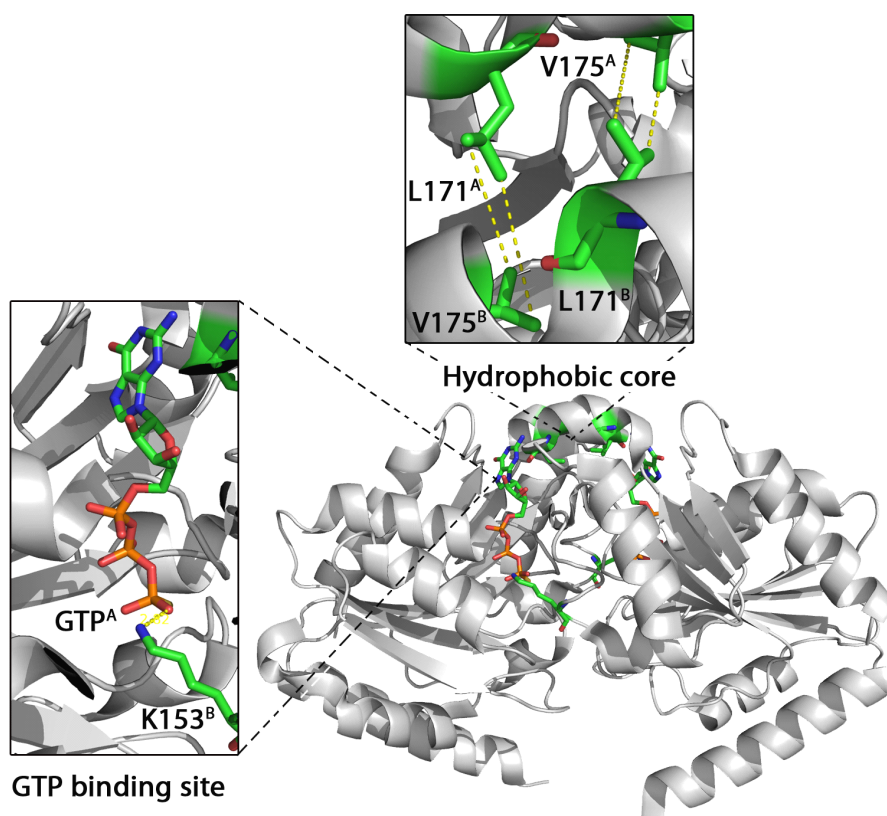

**FIGURE S3 Crystal structure of *M*/HypB (PDB ID: 2HF9).** The GTP binding site containing the bound GTP molecule and conserved K153, and the hydrophobic core region that contains L171 and V175 are highlighted.

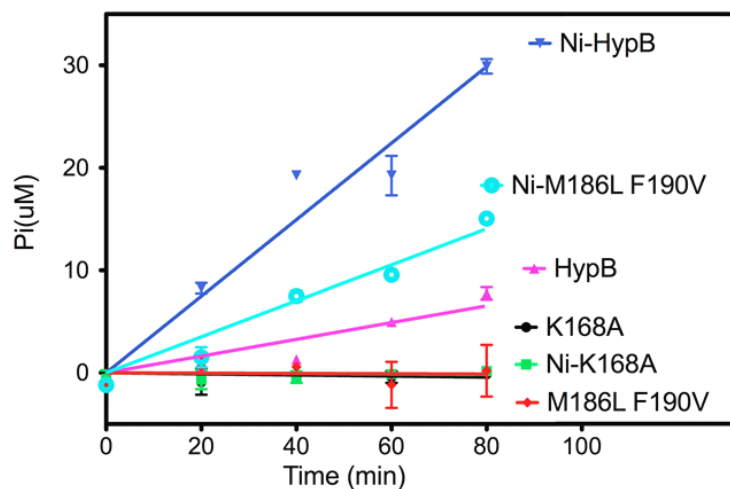

**FIGURE S4 GTPase activities of HypB and its mutants determined by Malachite Green method.** The GTP hydrolysis rates for all protein samples are linear within 80 mins.

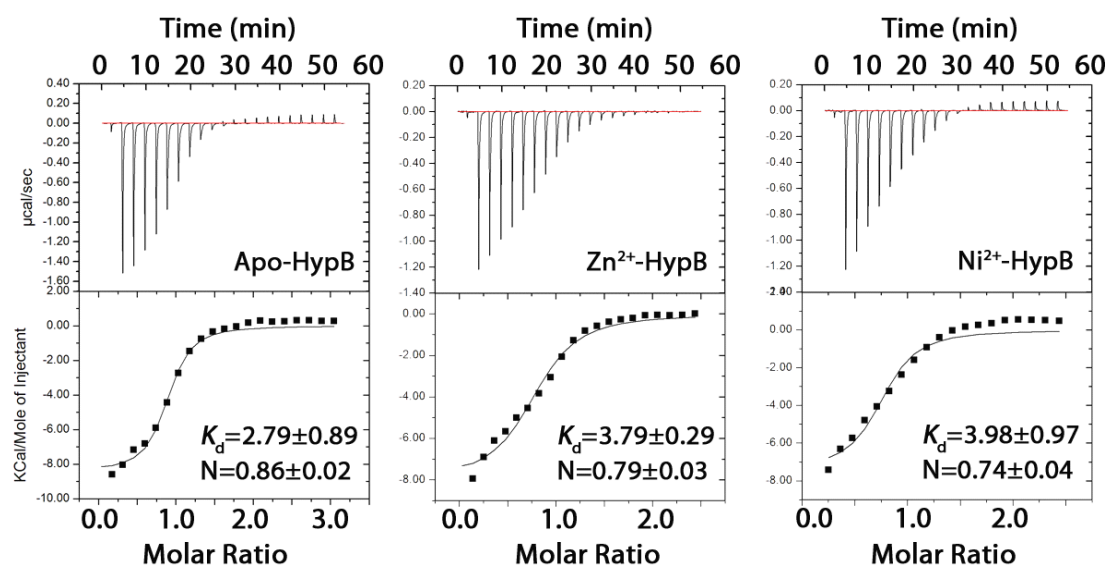

**FIGURE S5 Determination of binding affinities of GTP to HypB proteins by isothermal titration calorimetry.** The binding affinities of GTP to apo-,  $Zn^{2+}$  and  $Ni^{2+}$ -HypB are similar.

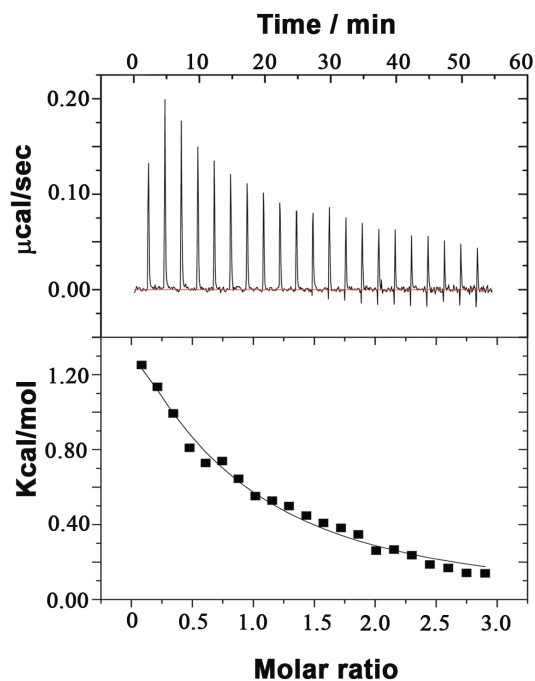

**FIGURE S6 Determination of binding affinities of HypA to HypB by isothermal titration calorimetry.** About 1.1 mM HypA in 20 mM HEPES buffer containing 100 mM NaCl, 2 mM TCEP, pH 7.0 was titrated into 0.1 mM apo-HypB in the same buffer and the dissociation constant ( $K_d$ ) was fitted to be  $57.9 \pm 8.5 \mu\text{M}$ .

**Table S3** MALDI-TOF MS/MS analysis of trypsin digested protein bands from SDS-PAGE.

| Sample             | Observed m/z | Predicted m/z | Predicted sequence <sup>a</sup> | Assignment    |
|--------------------|--------------|---------------|---------------------------------|---------------|
| Gel-band (~13 kDa) | 828.4812     | 827.4739      | VVVGIGER                        | HypA(29-36)   |
|                    | 1274.6421    | 1273.6348     | NVIITQGNEMR                     | HypA(98-108)  |
|                    | 1290.6326    | 1289.6253     | NVIITQGNEMR.L + Oxidation (M)   | HypA(98-108)  |
|                    | 2149.0220    | 2148.0147     | SLFVSAFETFREESLVCK              | HypA(42-59)   |
|                    | 2681.2380    | 2680.2307     | SAMDKSLFVSAFETFREESLVCK         | HypA(37-59)   |
| Gel-band (~27 kDa) | 1227.5720    | 1226.5647     | ADMVEVFNFR                      | HypB(184-193) |
|                    | 1482.7592    | 1481.7519     | SLEDFKNFLEK                     | HypB(220-231) |
|                    | 1685.7875    | 1684.7802     | EGLYVLNFMSSPGSGK                | HypB(44-59)   |
|                    | 2090.0212    | 2089.0139     | YLKEGLYVLNFMSSPGSGK             | HypB(41-59)   |
|                    | 3091.4070    | 3090.3997     | TTMLLENLADFKDFKFCVVEGDLQTNR     | HypB(60-85)   |
| Gel-band (~40 kDa) | 828.4967     | 827.4894      | VVVGIGER                        | HypA(29-36)   |
|                    | 1274.6780    | 1273.6707     | NVIITQGNEMR                     | HypA(98-108)  |
|                    | 1227.6097    | 1226.6024     | ADMVEVFNFR                      | HypB(184-193) |
|                    | 839.4700     | 838.4627      | NA <sup>b</sup>                 | NA            |
|                    | 800.4542     | 799.4469      | NA                              | NA            |

- a. MS data were collected on an ABI 4800 MALDI TOF/TOF analyzer with QuantIS precursor selector that allows the detection and identification of peptides at high resolution. Some of the digested peptides were subjected to MS/MS to confirm the peptide sequence and results were analyzed using MASCOT sequence query server.
- b. NA: no matched peptide.

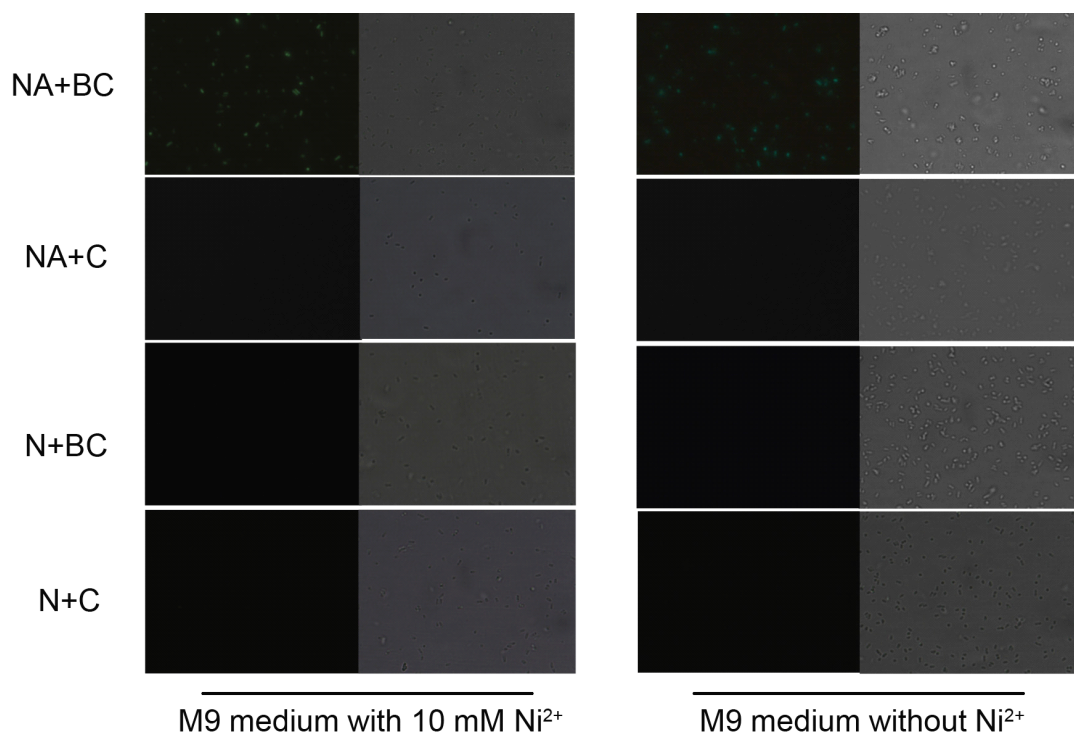

**FIGURE S7 The effect of Ni<sup>2+</sup> on the intracellular fluorescence.** Different combinations of fusion proteins are co-transformed into *E. coli* cells and co-expressed by addition of 100 μM IPTG and 0.015% arabinose in M9 minimal medium with or without 10 mM Ni<sup>2+</sup>. Phase contrast and fluorescence images of the cells were recorded. *E. coli* cells that co-expressed NGFP-HypA and HypB-CGFP proteins (NA+BC) yield green fluorescence, indicating that interaction between HypA and HypB was independent on the availability of Ni<sup>2+</sup>.



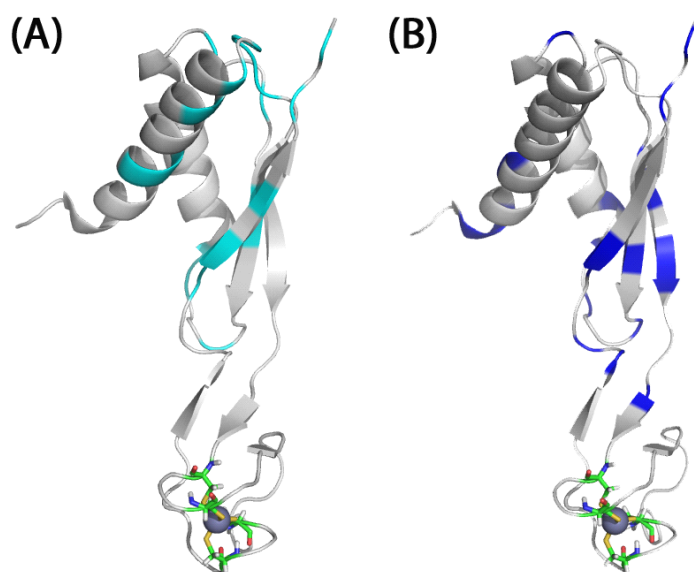

**FIGURE S8 Mapping the residues experiencing large chemical shift perturbations upon binding of (A) HypB and (B) Ni<sup>2+</sup> onto the structure of HypA, indicative of a similar pattern of location of those perturbed residues.**

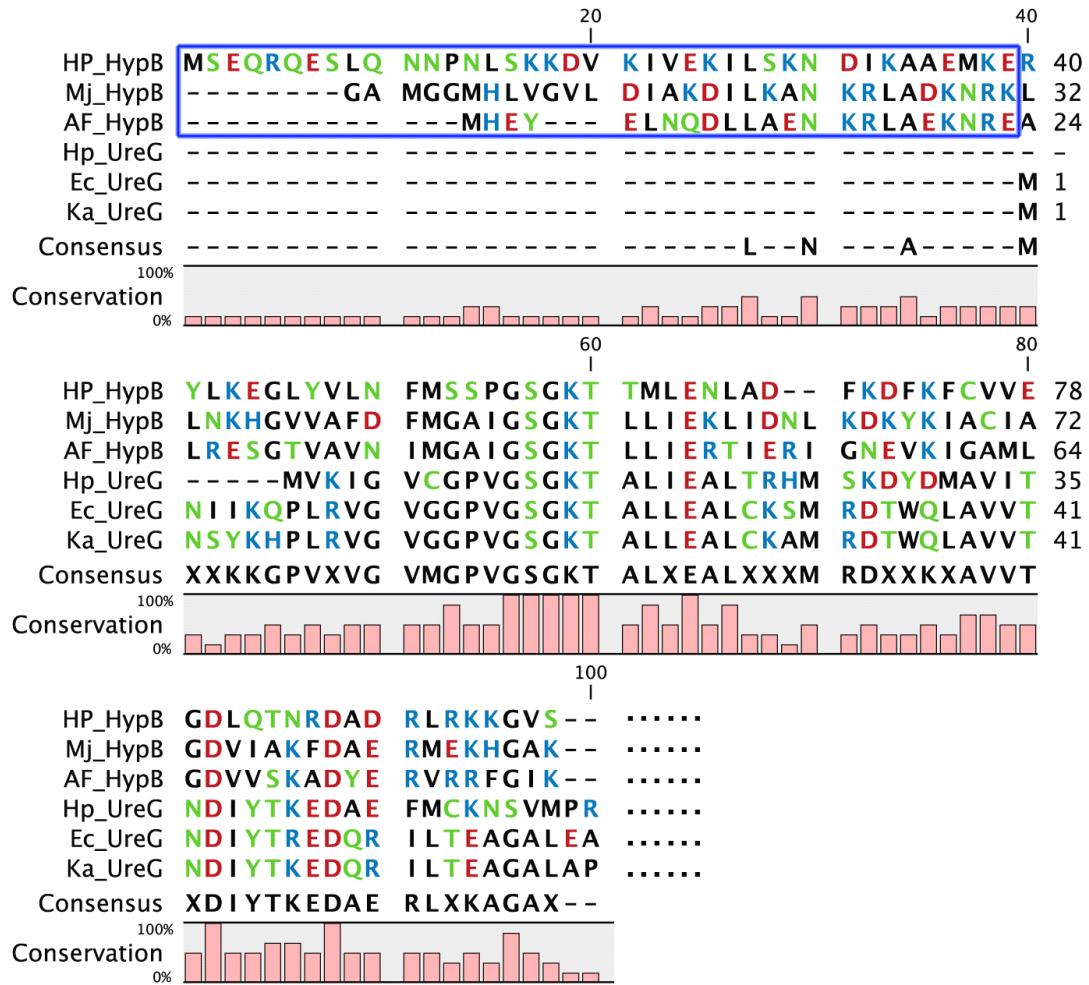

**FIGURE S9 Sequence alignments of HypB and UreG proteins.** The alignment is performed with HypB homologues of *Helicobacter pylori* 26695 (Hp\_HypB), *Methanococcus jannaschii* (Mj\_HypB), *Archaeoglobus fulgidus* (Af\_HypB) and UreG homologues of *Helicobacter pylori* 26695 (Hp\_UreG), *Escherichia coli* O157:H7 (Ec\_UreG), *Klebsiella aerogenes* (Ka\_UreG). The unique N-terminal regions of HypB homologues are highlighted in blue box.

*References*

1. Guzman, L. M., Belin, D., Carson, M. J., Beckwith, J. (1995) *J. Bacteriol.* **177**, 4121-4130.
2. Tao, A. L., He, S. H. (2004) *World J. Gastroenterol.* **10**, 2103-2108.
